# Supplementary material for: Gold nanoparticles become stable to cyanide etch when coated with hybrid lipid bilayers
Source: Royal Society of Chemistry journal article supplement (doi:10.1039/b801525b), 2008-01-01
Supplement: b801525b.pdf [file b801525b.pdf]

Electronic Supporting Information for:

**“Gold nanoparticles become stable to cyanide etch when coated with hybrid lipid bilayers”**

Sarita Sitaula, Marilyn R. Mackiewicz, and Scott M. Reed\*<sup>a</sup>

<sup>a</sup> Department of Chemistry, Portland State University, PO Box 751, Portland, OR, USA.  
Fax: +1 503 725 9525; Tel: +1 503 725 8512; E-mail: sreed@pdx.edu

**Materials and Methods.**

HAuCl<sub>4</sub> (Strem Chemicals) and 95% phosphatidylcholine (PC) from soybean (Avanti Polar Lipids) were used as received. CH<sub>2</sub>Cl<sub>2</sub> (Sigma-Aldrich) was filtered through basic alumina prior to use. H<sub>2</sub>O was from a Milli-Q ultra pure system. All other chemicals and reagent grade solvents were purchased from Sigma-Aldrich and used as received. Absorbance measurements were performed with an Ocean Optics USB2000 UV-Visible spectrophotometer using a 1.0 cm path length quartz cell.

**Method 1 for HBN Synthesis – Steps (i) through (iv) in Scheme 1**

***Synthesis of PC-coated Nanoparticles - step (i).***

PC-coated gold nanoparticles were prepared as previously reported with a slight modification.<sup>1</sup> Briefly, a CH<sub>2</sub>Cl<sub>2</sub> (10 mL) solution of PC (0.064 g, 0.084 mmol) was added to an aqueous solution of HAuCl<sub>4</sub> (0.029 g, 0.084 mmol in 10 mL of H<sub>2</sub>O) while stirring rapidly to form an emulsion. A freshly prepared aqueous solution of NaBH<sub>4</sub> (0.016 g, 0.42 mmol in 5 mL of H<sub>2</sub>O) was added dropwise. The solution was stirred for 1 h and was then stored overnight at 4°C followed by removal of both solvents by rotary evaporation. The sample was dissolved in a minimum amount of CH<sub>2</sub>Cl<sub>2</sub> and washed

with H<sub>2</sub>O (2 x 5 mL). The remaining solvent was removed by rotary evaporation and the product was dried *in vacuo* for 12 h.

***Solubility Conversion of Au-PC Nanoparticles – step (ii) and (iii).***

Au-PC nanoparticles were dissolved in CH<sub>2</sub>Cl<sub>2</sub> (1.0 mL), diluted to an optical density of 1.2 a.u. at 526 nm and dispensed into vials. Uniform thin films were produced by rotating the vials under a stream of N<sub>2</sub>. The films were further dried *in vacuo* for 12 h followed by re-suspension in H<sub>2</sub>O (1 mL) to produce water-soluble nanoparticles. Samples re-suspended to an optical density of 1.2 a.u. at 526 nm indicating no loss of material.

***Formation of HBNs – step (iv).***

1-decanethiol (1, 3, 5, 10, or 15 µl of a freshly prepared 1 mM ethanol solution) was added to a dilute aqueous solution (1 mL) of resuspended nanoparticles (OD at 526 nm=1.2 a.u.) and the mixtures were stirred for 5 min. Samples were used for KCN stability studies within 1 h of preparation.

**Transmission Electron Microscopy.**

Samples were prepared for Transmission Electron Microscopy (TEM) by drop casting dilute solutions of nanoparticles onto carbon-coated (300 Å) Formvar films on copper grids (Ted Pella). Samples were dried in air for at least 1 h before images were obtained. Transmission electron micrographs (Figure S1a) were acquired on an FEI Tecnai F-20 at an acceleration voltage of 200 kV using a CCD detector. Nanoparticle size analysis

(Figure S1b) was performed using ImageJ Software after applying a band pass filter to the images and adjusting the threshold. Images were collected of PC-coated nanoparticles as synthesized, after addition of 10  $\mu$ l of 1 mM 1-decanethiol, and 3 months after addition of KCN. The average size of the nanoparticles did not change significantly between these steps. The TEM taken after addition of cyanide revealed a portion ( $\sim$ 35%) of nanoparticles in distinct clusters, suggesting that a sub-population of the hybrid bilayers may encapsulate multiple nanoparticles.

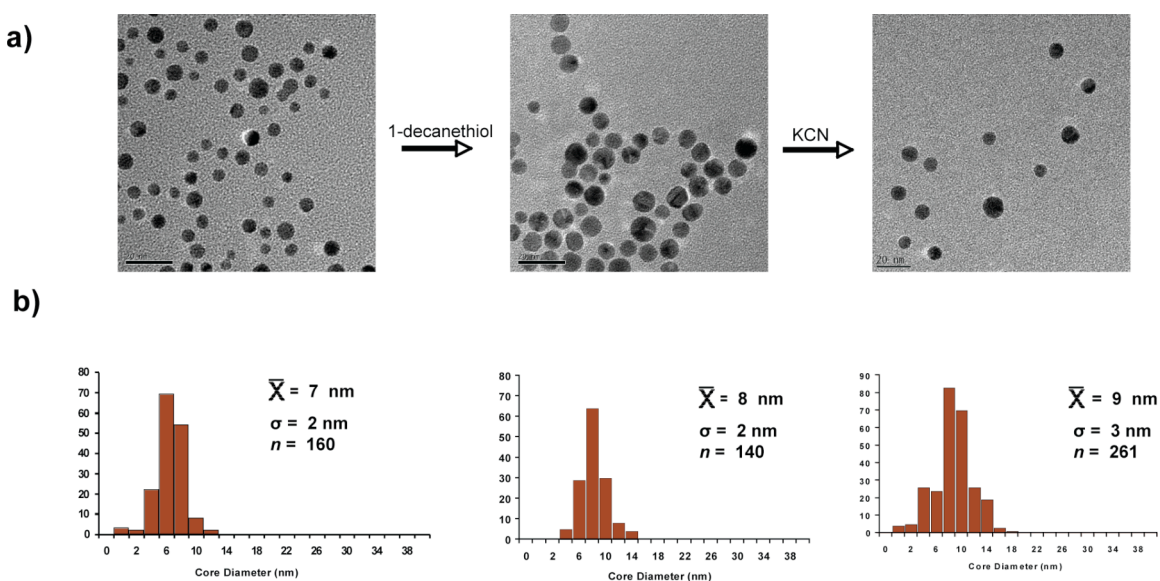

**Figure S1.** TEM analysis of PC-coated nanoparticles as synthesized (left), after addition of 10  $\mu$ l of a 1 mM ethanol solution of 1-decanethiol (center), and 3 months after addition of KCN (right). Scale bars = 20 nm.

### Method 2 for HBN synthesis – switching step (ii) and (iv).

1-decanethiol (1, 3, 5, 10, or 15  $\mu$ l of a 1 mM ethanol solution) was added to a dilute (1.2 a.u. at 526 nm)  $\text{CH}_2\text{Cl}_2$  solution of PC-coated nanoparticles (from step (i), Method 1) and the mixture was stirred for 5 min. KCN (1 mg) was added to a portion of these mixed-monolayer organic-soluble nanoparticles and the UV-Vis was monitored for 8 hours as the KCN dissolved (Figure S2).  $\text{CH}_2\text{Cl}_2$  was removed from another portion by rotary

evaporation and the film was dried *in vacuo* for 12 h. These thin films were re-suspended into water and stability to KCN was measured (Figure S3).

**Estimating the Quantity of Thiols on Each Nanoparticle.** The nanoparticle sample synthesized in step (i) contains 0.084 mmol of gold. The absence of Au<sup>3+</sup> in the UV absorption spectrum after the addition of sodium borohydride is evidence of a quantitative conversion of HAuCl<sub>4</sub> to nanoparticulate gold. In step (ii), the samples are diluted 200-fold to 1.2 a.u. (at 526 nm) resulting in a sample that contains 420 nmol of gold. We estimate a quantitative conversion in steps (ii) and (iii) based on the observation that the solubility change occurred without loss of material.<sup>1</sup> The number of gold atoms in a 7 nm diameter nanoparticle with a truncated cuboctahedral shape is estimated (using  $N = 283.7r^3$ , where  $r$  is the nanoparticle radius) to be 12,164 with ~15% of those atoms on the surface.<sup>2,3</sup> Therefore, a 1.2 OD sample of 7 nm nanoparticles contains approximately 63 nmol of surface gold atoms. When 10 nmol of 1-decanethiol is added to this sample, there are ~6 times more surface gold atoms available than thiols and ~42 times more total gold atoms than thiols indicating that the thiol is present in sub-monolayer quantities.

### **Stability Studies Using Various Thiols**

Thiols were added to dilute aqueous solutions of re-suspended PC-coated nanoparticles (OD at 526 nm=1.2 a.u.) as follows. 6-mercaptohexanol was added in 10  $\mu$ l of ethanol and stirred for 5 min. 2-mercaptoethanol was added in 10  $\mu$ l of ethanol and stirred for 5 min. Sodium 2-mercaptoethanesulfonate was solubilized in minimal water, added with

10  $\mu\text{l}$  of ethanol, and stirred for 5 min. 1-Decanethiol was added in 10  $\mu\text{l}$  of ethanol and stirred for 5 min. For detergent stability studies (Figure S4), 1-decanethiol in 10  $\mu\text{l}$  of ethanol was added and stirred for 5 min followed by addition of Triton X-100 (10.2  $\mu\text{l}$ ) and 15 min of stirring. KCN was added to each sample (6mM final concentration) and the UV-Vis was collected every minute for one hour. The average intensity of the  $\lambda_{\text{max}} \pm 2 \text{ nm}$  was calculated at 1 min intervals. 2-mercaptoethanol itself can act as an etchant causing a red-shift in the plasmon resonance of gold nanoparticles.<sup>4</sup> We exposed a sample of HBNs to 6 mM 2-mercaptoethanol and no substantial change was observed after one hour (Figure S5). In contrast, PC-coated nanoparticles aggregated when exposed to 6mM 2-mercaptoethanol as indicated by a red-shift of 20 nm in the plasmon resonance.

**Figure S2.** UV-Vis of PC-coated gold nanoparticles in  $\text{CH}_2\text{Cl}_2$  (red). The same sample 8 hours after addition of 10  $\mu\text{l}$  of 1 mM 1-decanethiol followed by addition of 15 mM KCN (blue).

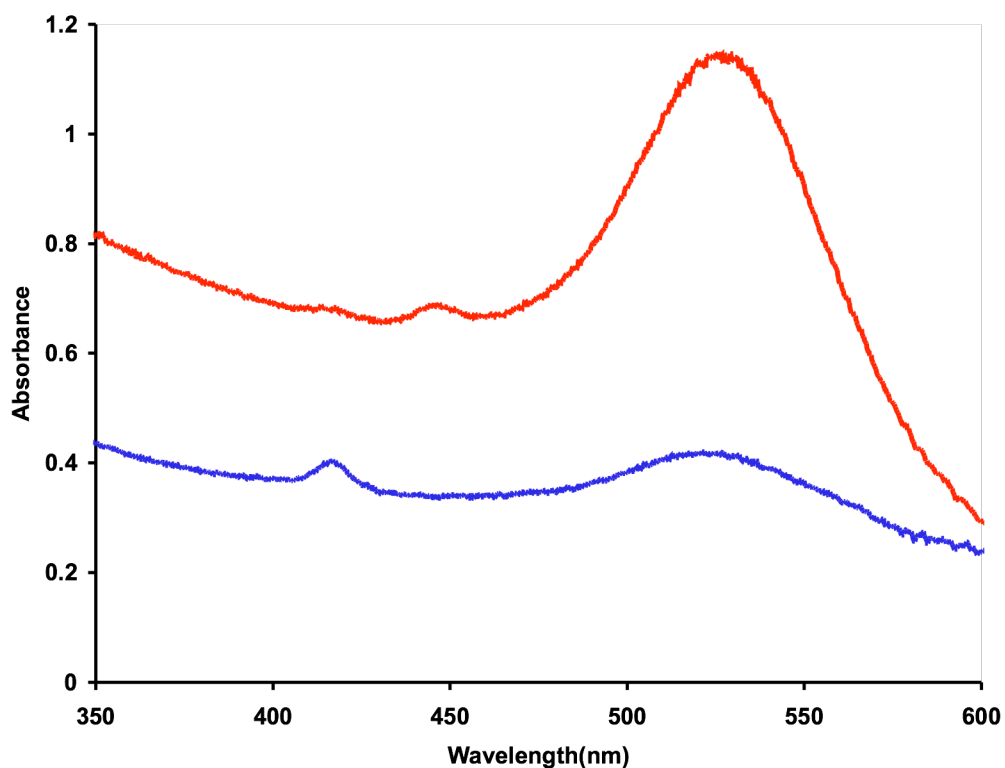

**Figure S3.** KCN stability of HBNs formed by method 2 with 1-decanethiol at 10  $\mu\text{M}$  ( $\blacklozenge$ ), 5  $\mu\text{M}$  ( $\blacktriangle$ ), 3  $\mu\text{M}$  ( $\blacksquare$ ), and 1  $\mu\text{M}$  ( $\blacklozenge$ ). Average intensity of the  $\lambda_{\text{max}} \pm 2$  nm was calculated each minute after addition of 6 mM KCN.

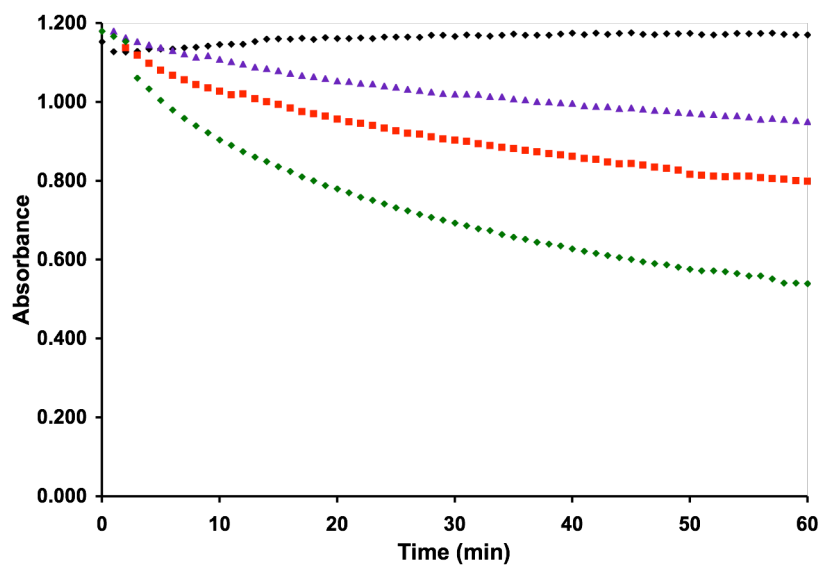

**Figure S4.** 1-Decanethiol HBNs after addition of 1% Triton (blue), 2 h after addition of 6 mM KCN (red), and 24 h after addition of 6 mM KCN (green).

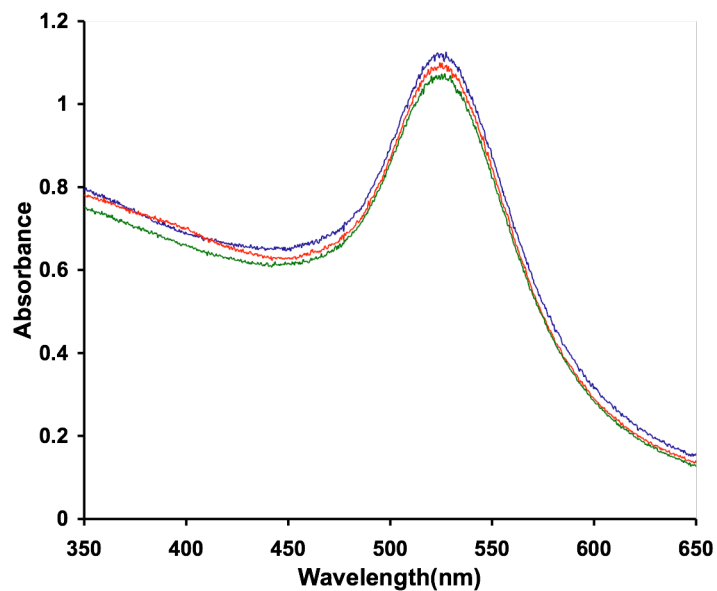

**Figure S5.** Reaction of HBNs with 2-mercaptoethanol. UV-Vis of HBNs prior to 2-mercaptoethanol addition (blue). UV-Vis of HBNs after 1 hour exposure to 6mM 2-mercaptoethanol (red).

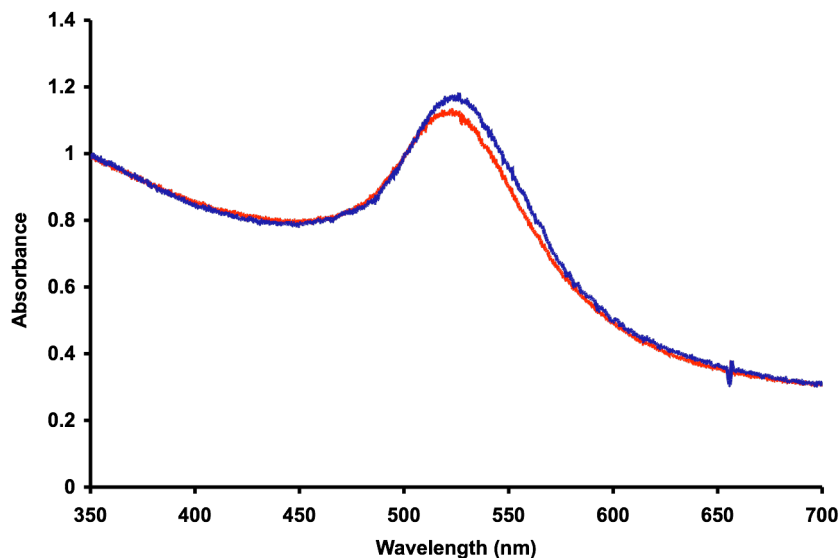

<sup>1</sup> M. R. Mackiewicz, B. R. Ayres and S. M. Reed, *Nanotechnology*, 2008, **19**, 115607.

<sup>2</sup> N. Nerambourg, M. H.V. Werts, M. Charlot and M. Blanchard-Desce, *Langmuir*, 2007, **23**, 5563 – 5570.

<sup>3</sup> M. J. Hostetler, J. E. Wingate, C-J. Zhong, J. E. Harris, R. W. Vachet, M. R. Clark, J. D. Londono, S. J. Green, J. J. Stokes, G. D. Wignall, G. L. Glish, M. D. Porter, N. D. Evans and R. W. Murray, *Langmuir*, 1998, **14**, 17 – 30.

<sup>4</sup>S-J. Chen and H-T.Chang, *Anal. Chem.*, 2004, **76**, 3727 – 3734.
